# Supplementary material for: Generation of reactive oxygen species is the primary mode of action and cause of survivin suppression by sepantronium bromide (YM155)
Source: Royal Society of Chemistry journal article supplement (doi:10.1039/d0md00383b), 2021-01-01
Supplement: d0md00383b1.pdf [file d0md00383b1.pdf]

## Supplementary Information

### Generation of Reactive Oxygen Species is the Primary Mode of Action and Cause of Survivin Suppression by Sepantronium Bromide (YM155)

Tasaduq Hussain Wani, Goutam Chowdhury and Anindita Chakrabarty

Content: Figures and legends

Figure S1: Chronic YM155 exposure led to adaptive drug resistance in TNBC cells

Figure S2: Quantitation of ROS signal obtained from TNBC P versus YMR cell lines at 0h (indicates base-level ROS) and  $\beta$ -gal assay

Figure S3: Persistent DNA damage was triggered by chronic YM155 treatment

Figure S4: Co-treatment with BSO reversed YM155 resistance

Figure S5: Treatment with GDC-0941 activated FoxO-1/3a and inhibited the MDA-MB-231 YMR cell proliferation

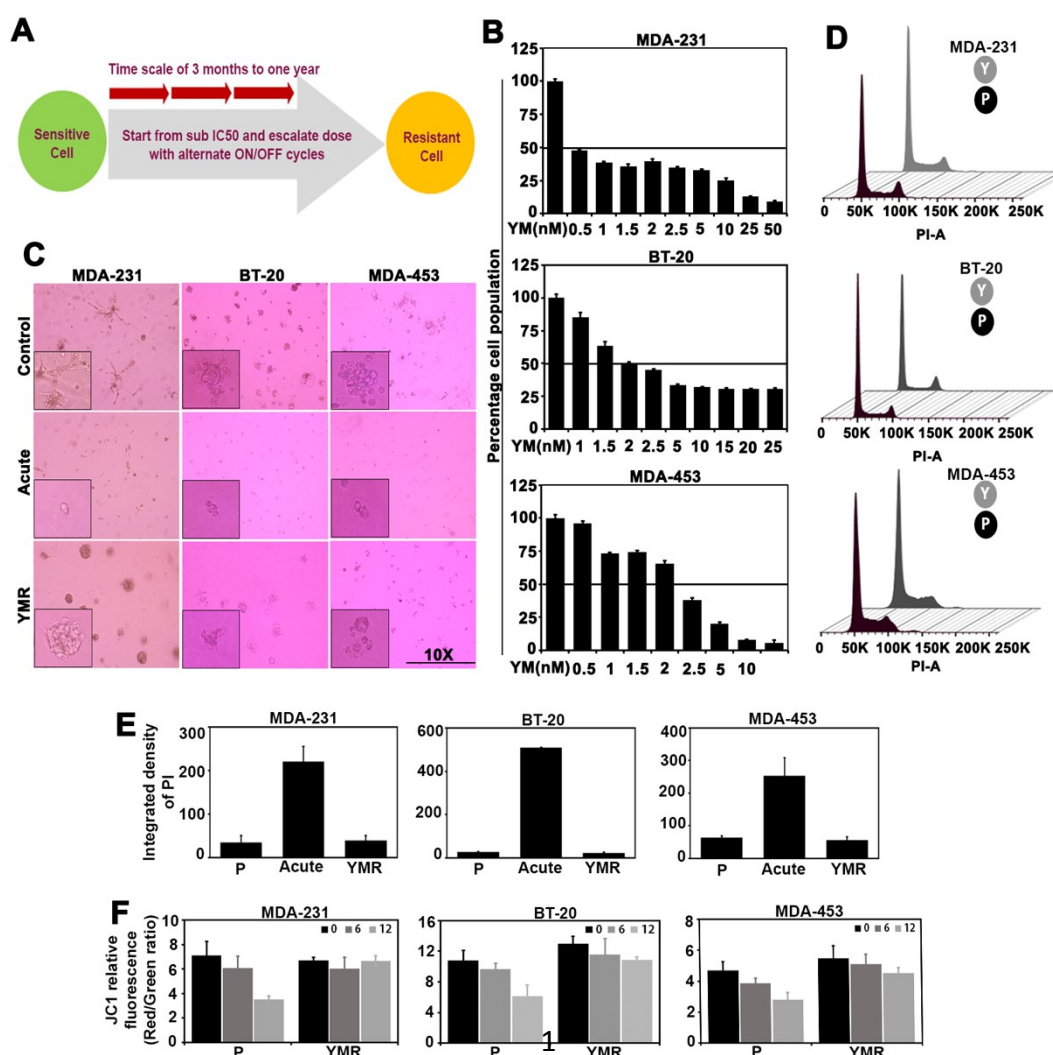

**Figure S1: Chronic YM155 exposure led to adaptive drug resistance in TNBC cells.** **A.** Schema for developing isogenic YM155 sensitive (P) and resistant (YMR) cell lines. **B.** Percentage cell population showing  $IC_{50}$  for P cell lines following 72h treatment with escalating dosages of YM155. **C.** 3-D Matrigel acini formation assay of P and YMR cell lines. Acute stands for P treated with YM155. **D.** Cell cycle analysis showing peak area for different stages of cell cycle in P versus YMR cell lines. **E.** Quantification of PI staining of P and YMR cells untreated and treated with YM155 for 72h. PI-positive cells indicate cell death. MDA-231 P versus Acute \*\*\*  $P=0.0005$ , Acute versus YMR \*\*\*  $P=0.0006$ ; BT-20 P versus Acute \*\*\*\*  $P<0.0001$ , Acute versus YMR \*\*\*\*  $P<0.0001$ ; MDA-453 P versus Acute \*\*\*  $P=0.0006$ , Acute versus YMR \*\*\*  $P=0.0005$ . P vs YMR is ns in all three cases. **F.** Quantification of JC-1 staining of P and YMR cells at 0, 6 and 12h following YM155 treatment. MDA-231 P 0h versus 12h \*  $P=0.0435$ ; BT-20 P 0h versus 12h \*  $P=0.0344$ . In all three YMR lines, 0h versus 12h remain ns.

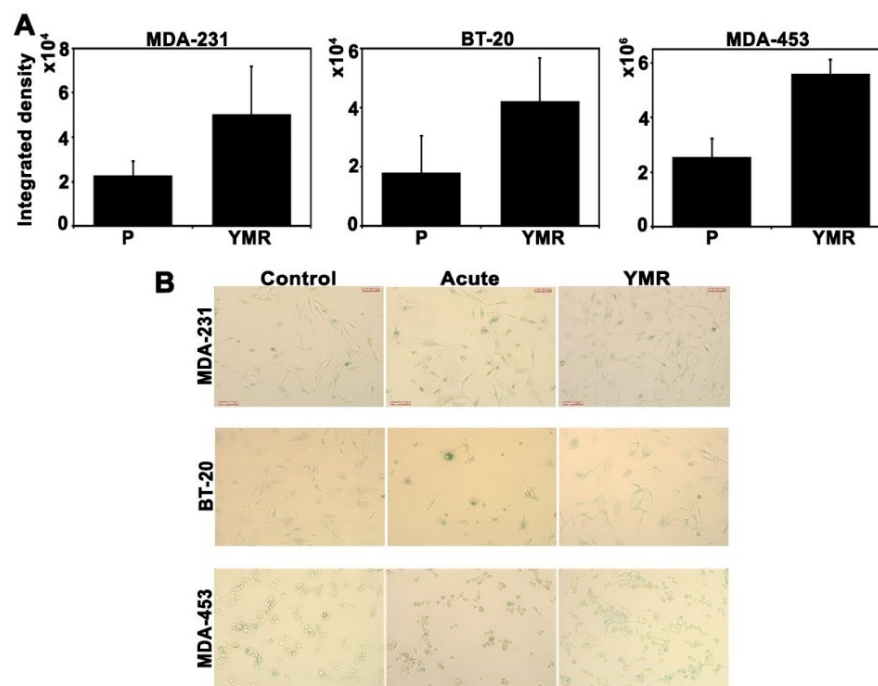

**Figure S2: Quantitation of ROS signal obtained from TNBC P versus YMR cell lines at 0h (indicates base-level ROS) and  $\beta$ -gal assay. A.** Image-J (NIH) analysis was done to perform quantitation of fluorescent signal obtained from the CellROX staining. **B.** Microscopic images representing SA- $\beta$ galactosidase activity in P versus YMR cells.

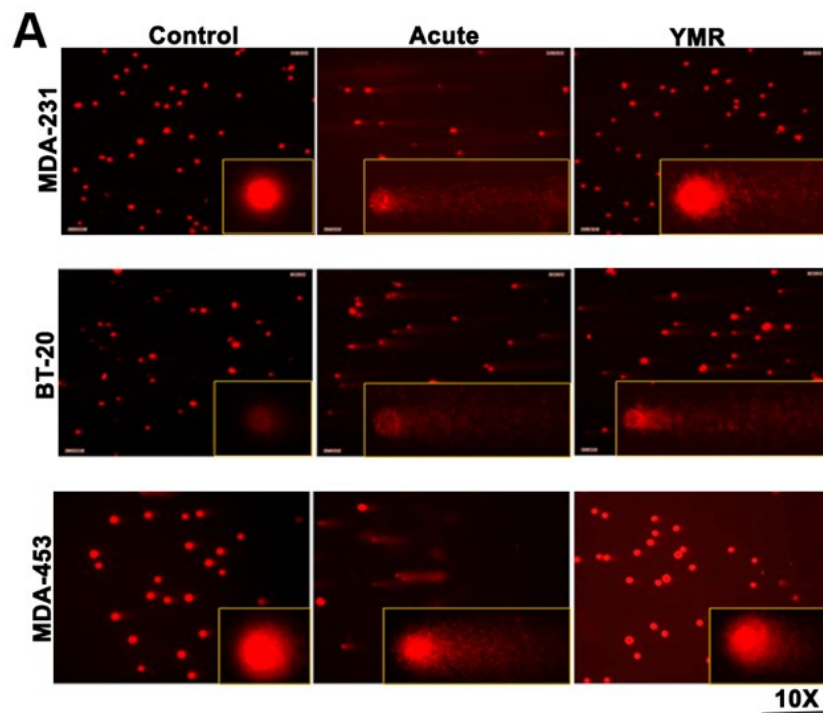

**Figure S3: Persistent DNA damage was triggered by chronic YM155 treatment. A.** Comet assay examining extent of DNA damage in P (treated: acute, untreated: control) and YMR cells.

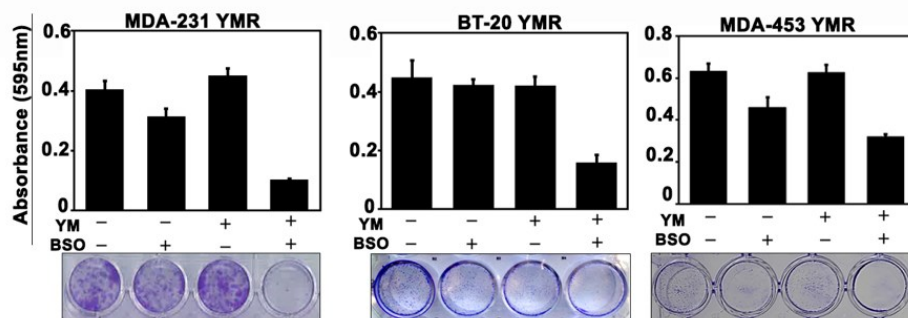

**Figure S4: Co-treatment with BSO reversed YM155 resistance.** Colonies remaining from YMR cells treated with or without BSO (500 $\mu$ M) alone or in combination with YM155. Upper panels show quantification while the lower panels represent the respective crystal-violet stained colonies.

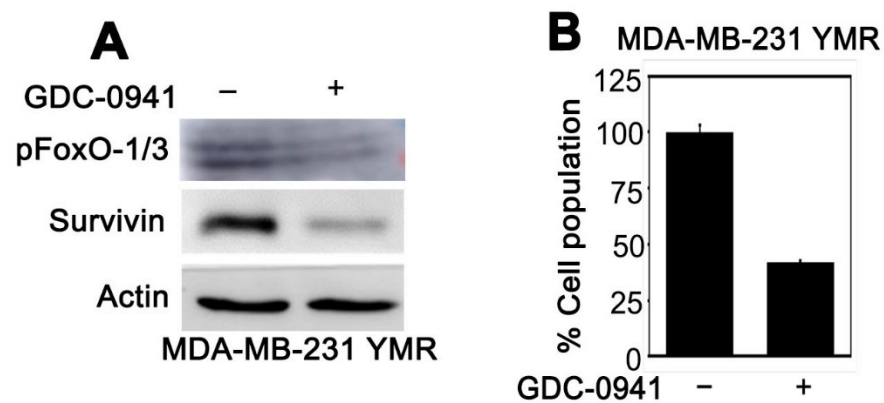

**Figure S5: Treatment with GDC-0941 activated FoxO-1/3a and inhibited the MDA-MB-231 YMR cell proliferation.** **A.** Immunoblot for 1 $\mu$ M GDC-0941 treatment comparing survivin and corresponding pFoxO-1/3a levels. **B.** Cell proliferation after 72 h GDC-0941 treatment.
